# Supplementary material for: Satellite Evidence for Divergent Forest Responses within Close Vicinity to Climate Fluctuations in a Complex Terrain
Source: MDPI journal article supplement (doi:10.3390/rs15112749), 2023-05-25
Supplement: s1 [file s1]

## Article

# Satellite Evidence for Divergent Forest Responses within Close Vicinity to Climate Fluctuations in a Complex Terrain

Jing Wang <sup>1,2</sup>, Wei Fang <sup>3</sup>, Peipei Xu <sup>1,2,\*</sup>, Hu Li <sup>1,2</sup>, Donghua Chen <sup>4</sup>, Zuo Wang <sup>1,2</sup>, Yuanhong You <sup>1,2</sup> and Christopher Rafaniello <sup>3</sup>

<sup>1</sup> School of Geography and Tourism, Anhui Normal University, Wuhu 241002, China; jw@ahnu.edu.cn (J.W.); lihu2881@ahnu.edu.cn (H.L.); wangzuo@ahnu.edu.cn (Z.W.); youyh@ahnu.edu.cn (Y.Y.)

<sup>2</sup> Engineering Technology Research Center of Resource Environment and GIS, Wuhu 241002, China

<sup>3</sup> Biology Department, Pace University, New York, NY 10038, USA; wfang@pace.edu (W.F.); cr05489n@pace.edu (C.R.)

<sup>4</sup> School of Computer and Information Engineering, Chuzhou University, Chuzhou 239000, China; chendonghua@chzu.edu.cn

\* Correspondence: xupei@ahnu.edu.cn; Tel.: +86-055-3591-0686

## Supplementary Materials:

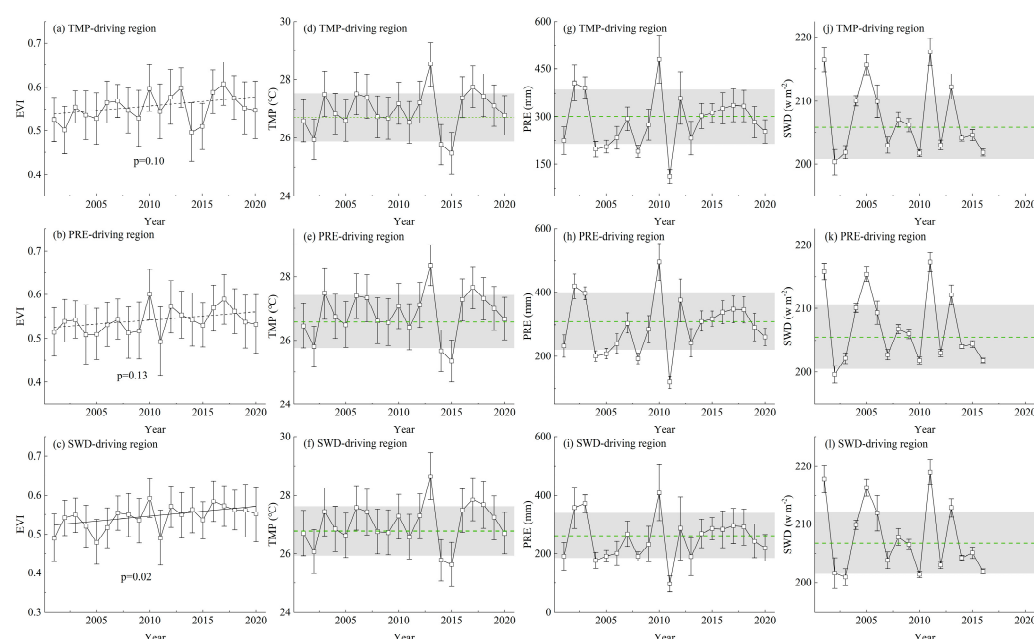

**Figure S1:** Time series of monthly average EVI (enhanced vegetation index, panel a-c), monthly average temperature (TMP (°C), panel d-f), monthly accumulative precipitation (PRE (mm), panel g-i), and monthly average solar radiation (SWD (w m<sup>-2</sup>), panel j-l) in regions dominated by different climate factors (panel a, d, g, j are TMP-driving; panel b, e, h, k are PRE-driving, and panel c, f, i, l are SWD-driving). Error bars indicate annual mean ± 1 standard deviation; Black dashed lines indicate non-significant trend of change while black solid lines indicate a significant trend of change based on Mann-Kendall test; Green dashed lines are 30-year average of TMP (1991-2020), PRE (1991-2020), and SWD (1987-2016); Gray areas indicate 30-year average ± 1 standard deviation. Based on this graph, hot (2013) vs cold (2015) year were chosen to be contrasted with adjacent normal temperature year (2011); and wet (2010) vs dry (2011) year were chosen to be contrasted with adjacent normal precipitation year (2009).

**Citation:** Wang, J.; Fang, W.; Xu, P.; Li, H.; Chen, D.; Wang, Z.; You, Y.; Rafaniello, C. Satellite Evidence for Divergent Forest Responses within Close Vicinity to Climate Fluctuations in a Complex Terrain. *Remote Sens.* **2023**, *15*, x.

<https://doi.org/10.3390/xxxxx>

Academic Editor(s):

Received: date

Revised: date

Accepted: date

Published: date

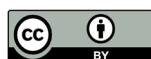

**Copyright:** © 2023 by the authors. Submitted for possible open access publication under the terms and conditions of the Creative Commons Attribution (CC BY) license (<https://creativecommons.org/licenses/by/4.0/>).

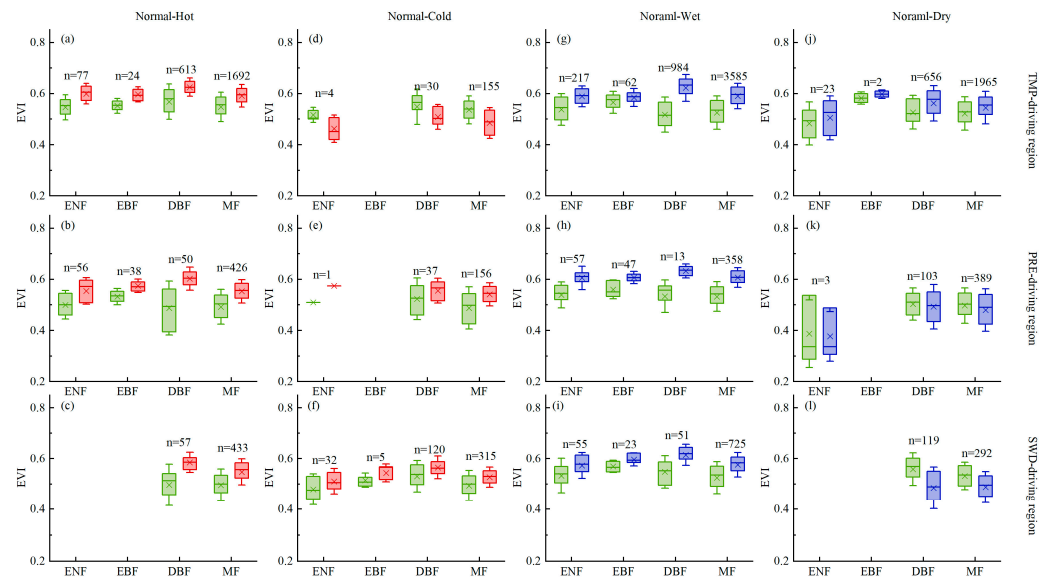

**Figure S2:** Responses of regional Enhanced Vegetation Index (EVI) to temperature and precipitation changes mainly driven by temperature (TMP), precipitation (PRE) and solar radiation (SWD) within each forest type (ENF: evergreen needle-leaved forest; EBF: evergreen broad-leaved forest; DBF: deciduous broad-leaved forest; MF: mixed forest) in regions predominantly driven by different climate factors. In panel a-c, EVI in high-temperature year (hot, in red, year 2013) vs normal-temperature year (normal, in green, year 2011) within each forest type in TMP-driving (a), PRE-driving (b), and SWD-driving (c) regions. In panel d-f, EVI in low-temperature year (cold, in red, year 2015) vs normal-temperature year (normal, in green, year 2011) within each forest type in TMP-driving (d), PRE-driving (e), and SWD-driving (f) regions. In panel g-i, EVI in high-precipitation year (wet, in blue, year 2010) vs normal-precipitation year (normal, in green, year 2009) within each forest type in TMP-driving (g), PRE-driving (h), and SWD-driving (i) regions. In panel j-l, EVI in low-precipitation year (dry, in blue, year 2011) vs normal-precipitation year (normal, in green, year 2009) within each forest type in TMP-driving (j), PRE-driving (k), and SWD-driving (l) regions. n represents the number of pixels.

**Table S1:** The maximum and minimum annual mean of temperature (TMP, °C), precipitation (PRE, mm), or radiation (SWD, w m<sup>-2</sup>), near 30-year average, and their corresponding years during 2001-2020 in regions driven by TMP, PRE and SWD.

| Climate Factors         | Regions driven | Maximum |        | Minimum |        | near 30-year average |        |
|-------------------------|----------------|---------|--------|---------|--------|----------------------|--------|
|                         |                | Year    | Value  | Year    | Value  | Year                 | Value  |
| TMP (°C)                | TMP            | 2013    | 28.52  | 2015    | 25.47  | 2011                 | 26.54  |
|                         | PRE            | 2013    | 28.36  | 2015    | 25.35  | 2011                 | 26.42  |
|                         | SWD            | 2013    | 28.65  | 2015    | 25.63  | 2011                 | 26.58  |
| PRE(mm)                 | TMP            | 2010    | 481.38 | 2011    | 113.20 | 2009                 | 274.90 |
|                         | PRE            | 2010    | 497.02 | 2011    | 118.74 | 2009                 | 285.70 |
|                         | SWD            | 2010    | 408.62 | 2011    | 95.72  | 2009                 | 232.78 |
| SWD(w m <sup>-2</sup> ) | TMP            | 2011    | 217.68 | 2002    | 200.33 | 2009                 | 206.17 |
|                         | PRE            | 2011    | 217.33 | 2002    | 199.63 | 2009                 | 206.04 |
|                         | SWD            | 2011    | 219.02 | 2003    | 200.94 | 2009                 | 206.62 |

**Table S2:** The 30-year average of temperature (TMP, °C), precipitation (PRE, mm), or radiation (SWD, w m<sup>-2</sup>), and their standard deviation in regions driven by TMP, PRE and SWD.

| Climate Factors                        | Regions driven | 30-year average | standard deviation |
|----------------------------------------|----------------|-----------------|--------------------|
| TMP (°C)<br>(1991-2020)                | TMP            | 26.71           | 0.83               |
|                                        | PRE            | 26.59           | 0.83               |
|                                        | SWD            | 26.77           | 0.84               |
| PRE(mm)<br>(1991-2020)                 | TMP            | 300.78          | 86.91              |
|                                        | PRE            | 310.45          | 89.64              |
|                                        | SWD            | 262.33          | 76.85              |
| SWD(w m <sup>-2</sup> )<br>(1987-2016) | TMP            | 205.84          | 5.09               |
|                                        | PRE            | 205.54          | 5.05               |
|                                        | SWD            | 206.84          | 5.32               |
